# Supplementary material
Source: Research Square preprint supplement (doi:10.21203/rs.3.rs-8952088/v1)
Supplement: Supplementary file 1 [file 092e59bce28b3438b36bb7e8.xlsx]

## Sheet: Table S1
Table S1.Comparison of baseline characteristics among the five joint gap difference groups
Item	d≤-1.0mm	-1.0mm<d≤-0.5mm	-0.5mm<d<0.5mm	0.5mm≤d<1.0mm	d≥1.0mm	p-value
n	39	39	94	34	46
Gender = M (%)	7 (17.9)	5 (12.8)	19 (20.2)	2 (5.9)	5 (10.9)	0.265
Age (years, mean±SD)	69.0±5.8	70.3±5.6	70.0±5.8	69.3±5.0	70.3±6.4	0.604
BMI (m2/kg, mean±SD)	25.6±3.1	26.4±3.5	26.0±4.1	27.1±3.7	25.7±3.0	0.365
HKA Group=Severe (%)	18 (46.2)	18 (46.2)	52 (55.3)	21 (61.8)	30 (65.2)	0.283
Side=R(%)	19 (48.7)	16 (41.0)	47 (50.0)	17 (50.0)	26 (56.5)	0.727
d means joint gap difference, n means number of patients, BMI means body mass index, HKA means hip-knee-ankle angle, M means male, R means right side, SD means standard deviation. P-value means the significance level for intergroup comparisons. Categorical variables were analyzed using the chi-square test and continuous variables were analyzed using analysis of variance.

## Sheet: Table S2
Table S2.Comparison of baseline characteristics among the six joint gap difference groups within the severe varus subgroup
Item	d≤-1.0mm	-1.0mm<d≤-0.5mm	-0.5mm<d<0.5mm	0.5mm≤d<1.0mm	1mm≤d<1.5mm	d≥1.5mm	p-value
n	18	18	52	21	18	12
Gender = M (%)	7 (17.9)	5 (12.8)	19 (20.2)	2 (5.9)	1 (4.0)	1 (8.30)	0.237
Age (years, mean±SD)	68.97±5.8	70.31±5.6	68.98±5.8	69.26±5.0	70.08±6.6	70.17±6.6	0.648
BMI (m2/kg, mean±SD)	25.60±3.1	26.36±3.5	25.95±4.1	27.14±3.7	25.10±2.2	26.73±4.5	0.29
Side=R(%)	19 (48.7)	16 (41.0)	47 (50.0)	17 (50.0)	15 (60.0)	8 (66.7)	0.804
d means joint space difference, n means number of patients, BMI means body mass index, M means male, R means right side, SD means standard deviation. P-value means the significance level for intergroup comparisons. Categorical variables were analyzed using the chi-square test and continuous variables were analyzed using analysis of variance.

## Sheet: Table S3
Table S3.Comparison of baseline characteristics among the six joint gap difference groups within the mild varus subgroup
Item	d≤-1.0mm	-1.0mm<d≤-0.5mm	-0.5mm<d<0.5mm	0.5mm≤d<1.0mm	1mm≤d<1.5mm	d≥1.5mm	p-value
n	21	21	42	13	7	9
Gender = M (%)	4 (19.0)	2 (9.5)	7 (16.7)	0 (0)	1 (14.3)	3 (33.3)	0.357
Age (years, mean±SD)	68.4±6.7	68.6±4.7	68.1±5.0	67.8±5.4	72.3±3.9	71.1±6.0	0.323
BMI (m2/kg, mean±SD)	25.5±2.8	26.6±3.5	27.0±4.4	27.4±2.7	25.2±3.0	26.2±2.2	0.264
Side=R(%)	12 (57.1)	8 (38.1)	26 (61.9)	6 (46.2)	4 (57.1)	3 (33.3)	0.415
d means joint space difference, n means number of patients, BMI means body mass index, M means male, R means right side, SD means standard deviation. P-value means the significance level for intergroup comparisons. Categorical variables were analyzed using the chi-square test and continuous variables were analyzed using analysis of variance.

## Sheet: Table S4
Table S4.Comparison of baseline characteristics among the six joint gap difference groups within the lower-age subgroup
Item	d≤-1.0mm	-1.0mm<d≤-0.5mm	-0.5mm<d<0.5mm	0.5mm≤d<1.0mm	1mm≤d<1.5mm	d≥1.5mm	p-value
n	21	15	53	17	8	11
Gender = M (%)	5 (23.8)	0 (0)	9 (17.0)	1 (5.9)	0 (0)	2 (18.2)	0.216
HKA-Group=Severe (%)	10 (47.6)	5 (33.3)	25 (47.2)	10 (58.8)	7 (87.5)	7 (63.6)	0.176
BMI (m2/kg, mean±SD)	25.5±3.3	27.3±3.6	26.2±4.7	27.7±3.2	25.6±1.7	26.9±4.6	0.525
Side=R(%)	10 (47.6)	5 (33.3)	28 (52.8)	8 (47.1)	6 (75.0)	6 (54.5)	0.546
d means joint space difference, n means number of patients, BMI means body mass index, HKA means hip-knee-ankle angle, M means male, R means right side, SD means standard deviation. P-value means the significance level for intergroup comparisons. Categorical variables were analyzed using the chi-square test and continuous variables were analyzed using analysis of variance.

## Sheet: Table S5
Table S5.Comparison of baseline characteristics among the six joint gap difference groups within the higher-age subgroup
Item	d≤-1.0mm	-1.0mm<d≤-0.5mm	-0.5mm<d<0.5mm	0.5mm≤d<1.0mm	1mm≤d<1.5mm	d≥1.5mm	p-value
n	18	24	41	17	17	10
Gender = M (%)	2 (11.1)	5 (20.8)	10 (24.4)	1 (5.9)	1 (5.9)	2 (20.0)	0.367
HKA-Group=Severe(%)	8 (44.4)	13 (54.2)	27 (65.9)	11 (64.7)	11 (64.7)	5 (50.0)	0.639
BMI (m2/kg, mean±SD)	25.7±3.0	25.7±3.42)	25.6±3.1	26.6±4.2	24.9±2.4	26.1±2.5	0.754
Side=R(%)	9 (50.0)	11 (45.8)	19 (46.3)	9 (52.9)	9 (52.9)	5 (50.0)	0.994
d means joint space difference, n means number of patients, BMI means body mass index, HKA means hip-knee-ankle angle, M means male, R means right side, SD means standard deviation. P-value means the significance level for intergroup comparisons. Categorical variables were analyzed using the chi-square test and continuous variables were analyzed using analysis of variance.

## Sheet: Table S6
Table S6.Comparison of baseline characteristics among the six joint gap difference groups within the normal BMI subgroup
Item	d≤-1.0mm	-1.0mm<d≤-0.5mm	-0.5mm<d<0.5mm	0.5mm≤d<1.0mm	1mm≤d<1.5mm	d≥1.5mm	p-value
n	18	15	43	8	12	7
Gender = M (%)	1 (5.6)	3 (20.0)	11 (25.6)	1 (12.5)	1 (8.3)	2 (28.6)	0.422
HKA-Group=Severe(%)	7 (38.9)	8 (53.3)	28 (65.1)	6 (75.0)	7 (58.3)	4 (57.1)	0.395
Age (years, mean±SD)	70.5±5.4	72.5±6.6	70.5±5.9	70.2±4.2	70.8±5.9	71.0±8.8	0.913
Side=R(%)	9 (50.0)	6 (40.0)	26 (60.5)	5 (62.5)	8 (66.7)	3 (42.9)	0.721
d means joint space difference, n means number of patients, HKA means hip-knee-ankle angle, M means male, R means right side, SD means standard deviation. P-value means the significance level for intergroup comparisons. Categorical variables were analyzed using the chi-square test and continuous variables were analyzed using analysis of variance.

## Sheet: Table S7
Table S7.Comparison of baseline characteristics among the six joint gap difference groups within the overweight subgroup
Item	d≤-1.0mm	-1.0mm<d≤-0.5mm	-0.5mm<d<0.5mm	0.5mm≤d<1.0mm	1mm≤d<1.5mm	d≥1.5mm	p-value
n	21	24	51	26	13	14
Gender = M (%)	6 (28.6)	2 (8.3)	8 (15.7)	1 (3.8)	0 (0)	2 (14.3)	0.097
HKA-Group=Severe(%)	11 (52.4)	10 (41.7)	24 (47.1)	15 (57.7)	11 (84.6)	7 (50.0)	0.191
Age (years, mea n(SD))	67.7±6.0	68.9±4.4	67.7±5.6	69.0±5.2	69.4±7.4	70.4±4.9	0.604
Side=R(%)	10 (47.6)	10 (41.7)	21 (41.2)	12 (46.2)	7 (53.8)	7 (50.0)	0.96
d means joint space difference, n means number of patients, HKA means hip-knee-ankle angle, M means male, R means right side, SD means standard deviation. P-value means the significance level for intergroup comparisons. Categorical variables were analyzed using the chi-square test and continuous variables were analyzed using analysis of variance.

## Sheet: Table S8
Table S8.Comparison of post-TKA outcomes among six joint gap difference groups within the higher-age subgroup
Items	d≤-1.0mm	-1.0mm<d≤-0.5mm	-0.5mm<d<0.5mm	0.5mm≤d<1.0mm	1mm≤d<1.5mm	d≥1.5mm	p-value
Total KSS improvements	67.5±21.9	71.0±25.0	68.5±19.1	85.2±20.3	92.6±21.3	81.8±22.4	6.794×10-4 (T-K)
Clinical KSS improvements	42.8±17.1	43.3±16.8	42.4±14.1	53.2±11.1	54.6±11.9	53.8±18.5	8.588×10-3(T-K)
Functional KSS improvements	24.7±13.0	27.7±12.4	26.1±9.8	32.1±14.0	37.9±11.7	28.0±7.9	7.956×10-3 (T-K)
WOMAC improvements	26.8±6.3	30.4±9.2	34.3±9.2	38.2±7.4	39.5±6.7	36.0±6.7	1.823×10-5 (T-K)
Postoperative total KSS	147.3±19.2	149.8±17.4	152.4±16.3	162.0±9.4	161.3±7.2	155.2±11.2	8.227×10-3 (T-K)
Postoperative clinical KSS	86.2±13.2	87.5±10.1	90.0±8.8	94.4±5.5	92.5±5.4	90.2±5.5	0.132 (Dunn)
Postoperative Functional KSS	61.1±10.8	62.3±9.6	62.4±8.9	67.6±7.5	68.8±3.3	65.0±7.1	0.011 (Dunn)
Postoperative WOMAC	16.6±9.4	14.5±8.4	13.0±7.7	9.65±5.9	8.76±3.0	12.2±5.3	0.025 (Dunn)
Postoperative FJS-12	78.9±13.9	77.8±9.2	76.1±14.2	82.7±6.9	84.9±8.8	80.8±13.2	0.158 (Dunn)
Data are presented as mean ± standard deviation. d means joint space difference, KSS means Knee Society Score, WOMAC means Western Ontario and McMaster Universities Osteoarthritis Index, FJS-12 means Forgotten Joint Score-12. P-values were derived from the Kruskal-Wallis test (K-W test) or One-way Analysis of Variance（One-way ANOVA). Dunn means Dunn’s test was used in the multiple comparisons. T-…

## Sheet: Table S9
Table S9.Comparison of post-TKA outcomes among six joint gap difference groups within the lower-age subgroup
Items	d≤-1.0mm	-1.0mm<d≤-0.5mm	-0.5mm<d<0.5mm	0.5mm≤d<1.0mm	1mm≤d<1.5mm	d≥1.5mm	p-value
Total KSS improvements	54.2±23.1	69.4±16.8	72.0±22.4	75.3±17.4	79.9±12.0	74.7±9.6	5.729×10-3 (T-K)
Clinical KSS improvements	35.3±17.2	45.4±15.1	43.1±15.9	47.9±13.1	49.2±6.4	46.1±10.7	0.092 (T-K)
Functional KSS improvements	19.0±10.4	24.0±8.9	28.9±11.2	27.4±6.6	30.6±8.6	28.6±7.4	0.012 (Dunn)
WOMAC improvements	25.9±8.3	30.1±10.7	32.6±8.5	35.5±7.8	33.5±7.5	33.5±5.4	0.010 (T-K)
Postoperative total KSS	147.5±20.2	151.7±14.5	155.9±13.1	157.5±9.1	158.8±11.0	150.5±20.3	0.489 (Dunn)
Postoperative clinical KSS	86.6±13.0	89.7±8.0	90.4±8.3	91.6±7.1	91.2±8.4	88.3±11.1	0.882 (Dunn)
Postoperative Functional KSS	86.6±9.4	62.0±9.4	65.5±7.5	65.9±5.1	67.5±4.7	62.3±10.3	0.207 (Dunn)
Postoperative WOMAC	15.3±6.9	15.1±7.0	12.4±6.3	10.1±3.4	9.2±4.3	14.2±7.5	0.062 (Dunn)
Postoperative FJS-12	77.7±13.4	77.2±11.3	77.1±12.6	78.9±8.9	76.6±6.5	71.6±22.1	0.963 (Dunn)
Data are presented as mean ± standard deviation. d means joint space difference, KSS means Knee Society Score, WOMAC means Western Ontario and McMaster Universities Osteoarthritis Index, FJS-12 means Forgotten Joint Score-12. P-values were derived from the Kruskal-Wallis test (K-W test) or One-way Analysis of Variance（One-way ANOVA).Dunn means Dunn’s test was used in the multiple comparisons. T-K…

## Sheet: Table 10
Table S10.Comparison of post-TKA outcomes among six joint gap difference groups within the mild varus subgroup
Items	d≤-1.0mm	-1.0mm<d≤-0.5mm	-0.5mm<d<0.5mm	0.5mm≤d<1.0mm	1mm≤d<1.5mm	d≥1.5mm	p-value
Total KSS improvements	51.8±23.5	66.2±21.1	67.6±21.4	68.5±14.1	95.1±18.6	73.7±22.0	4.199×10-3 (Dunn)
Clinical KSS improvements	31.5±15.9	40.0±12.0	41.5±15.8	44.6±11.6	56.6±11.3	44.8±19.0	9.491×10-3 (Dunn)
Functional KSS improvements	20.2±13.3	26.2±11.8	26.1±10.0	23.8±8.7	38.6±9.4	28.9±10.2	0.011 (Dunn)
WOMAC improvements	23.5±6.7	28.1±9.9	30.9±7.8	33.9±7.8	37.3±7.7	32.8±6.7	4.603×10-4 (Dunn)
Postoperative total KSS	141.4±22.0	147.7±19.4	151.7±15.7	156.8±11.8	164.1±3.6	145.6±21.2	0.022 (Dunn)
Postoperative clinical KSS	82.3±14.3	86.9±10.8	89.3±8.5	94.1±3.6	92.2±6.9	85.0±10.9	0.093 (Dunn)
Postoperative Functional KSS	59.0±11.4	60.7±10.5	62.4±9.3	64.6±8.8	70.0±0	60.6±11.8	0.110 (Dunn)
Postoperative WOMAC	18.5±8.7	16.8±8.3	12.9±6.4	10.8±5.5	8.14±2.0	15.1±7.3	2.674×10-3 (Dunn)
Postoperative FJS-12	78.8±11.3	75.6±11.0	74.9±12.9	80.1±6.4	83.9±8.4	73.4±14.0	0.367 (Dunn)
Data are presented as mean ± standard deviation. d means joint space difference, KSS means Knee Society Score, WOMAC means Western Ontario and McMaster Universities Osteoarthritis Index, FJS-12 means Forgotten Joint Score-12. P-values were derived from the Kruskal-Wallis test (K-W test).Dunn means Dunn’s test was used in the multiple comparisons. T-K means Tukey-Kramer's test was used in the mult…

[truncated: 3 more sheets: Table S11, Table S12, Table S13]
